# Supplementary material for: Solvation in aqueous binary mixtures: consequences of the hydrophobic character of the ionic liquids and the solvatochromic probes
Source: Royal Society of Chemistry journal article supplement (doi:10.1039/c2nj40506g), 2012-01-01
Supplement: c2nj40506g.pdf [file c2nj40506g.pdf]

[1]

*NJ-ART-06-2012-040506-ESI-Revised*

**Solvation in aqueous binary mixtures: Consequences of the hydrophobic character of the ionic liquids and the solvatochromic probes**

**Bruno M. Sato, Clarissa T. Martins and Omar A. El Seoud\***

**Institute of Chemistry, University of São Paulo, P. O. Box 26077,**

**05513-970, São Paulo, S. P., Brazil; E-mail <elseoud@iq.usp.br>**

***Description of the solvation model applied for treating the data in binary solvent mixtures***

The equations below describe the solvent-exchange equilibria in the solvation shell of the probe:

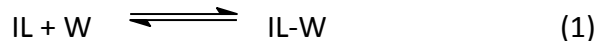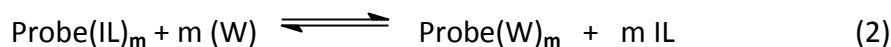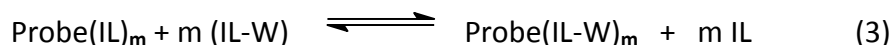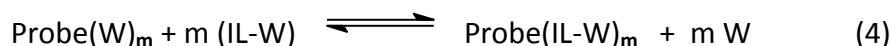

Where (*m*) represents the *average* number of solvent molecules whose exchange in the probe solvation shell affects  $E_T(\text{probe})$ ; usually  $m \leq 2$ ; (*m*) should not be confused with *the total number* of solvent molecules that solvate the probe. An important consequence of this model is that the mole fractions that we have employed in our calculations are “*effective*” not *analytical* ones.<sup>1</sup> The formation of hydrogen-bonded complexes between ILs, e.g., BuMeImBF<sub>4</sub> or AlBuImCl and water has been demonstrated by IR,<sup>2a,b</sup> NIR,<sup>3</sup> <sup>1</sup>H NMR,<sup>4</sup> and predicted by theoretical calculations.<sup>5,6</sup>

The equilibrium constants of Eqs. (5) to (7) are termed solvent “fractionation factors,  $\varphi$ ”, defined on the mole fraction scale, after rearrangement, as:

$$\varphi_{\text{W/IL}} = \frac{x_{\text{W}}^{\text{Probe}} / x_{\text{IL}}^{\text{Probe}}}{(x_{\text{W}}^{\text{Bk; Effective}} / x_{\text{IL}}^{\text{Bk; Effective}})^m} \quad (5)$$

[2]

$$\varphi_{\text{IL-W/IL}} = \frac{x_{\text{IL-W}}^{\text{Probe}} / x_{\text{IL}}^{\text{Probe}}}{(x_{\text{IL-W}}^{\text{Bk; Effective}} / x_{\text{IL}}^{\text{Bk; Effective}})^m} \quad (6)$$

$$\varphi_{\text{IL-W/W}} = \frac{x_{\text{IL-W}}^{\text{Probe}} / x_{\text{W}}^{\text{Probe}}}{(x_{\text{IL-W}}^{\text{Bk; Effective}} / x_{\text{W}}^{\text{Bk; Effective}})^m} \quad (7)$$

Where (Bk,Effective) refers to the effective concentration of a solvent species (IL, W, IL-W) in bulk solvent.

Calculation of the effective concentrations of the solvent species present requires knowledge of the association constant,  $K_{\text{assoc}}$ , between IL and water. These data were previously showed in a recent study.<sup>7</sup>

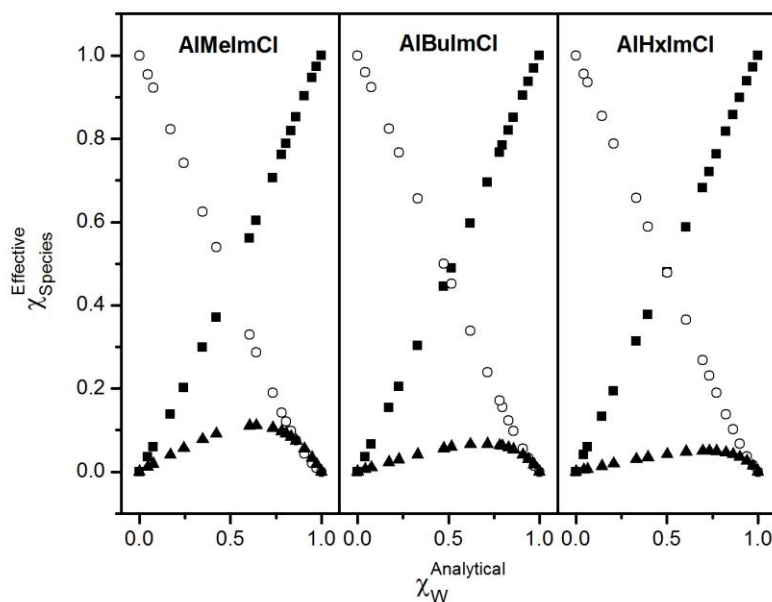

Figure ESI-1: Representative dependence of the concentrations of the species in the IL-W binary mixtures on the length of R of AIRImCl. The data shown are for 25 °C; the symbols employed are ○, ■, ▲ for IL, W, and the IL-W 1:1 complex, respectively. Data reproduced from reference 7.

## References

1. Y. Jeon, J. Sung, D. Kim, C. Seo, H. Cheong, Y. Ouchi, R. Ozawa, and H. Hamaguchi, *J. Phys. Chem. B*, **2008**, 112, 923-928.
2. (a) L. Cammarata, S. G. Kazarian, P. A. Salter, T. Welton, T., *Phys. Chem. Chem. Phys.* **2001**, 3, 5192-5200; (b) L. P. N. Rebelo, V. Najdanovic-Visak, Z. P. Visak, M. N. da Ponte, J. Szydowski, C. A. Cerdeirina, J. Troncoso, L. Romani, J. M. S. S Esperanca, H. J. R. Guedes, H. C. de Sousa, *Green Chem.*, **2004**, 6, 369-381.
3. C. D. Tran, S. H. D. Lacerda, D. Oliveira, *Appl. Spectrosc.*, 2003, **57**, 152-157.
4. C. T. Martins, B. M. Sato, O. A. El Seoud, *J. Phys. Chem. B*, **2008**, 112, 8330-8339.
5. Y. Wang, H. R. Li, S. J. Han, *J. Phys. Chem. B*, 2006, **110**, 24646-24651
6. W. J. Li, Z. F. Zhang, B. X. Han, S. Q. Hu, Y. Xie, G. Y. Yang, *J. Phys. Chem. B*, 2007, **111**, 6452-6456.
7. B. M. Sato, C. G de Oliveira, C. T. Martins, O. A. El Seoud, *Phys. Chem. Chem. Phys.*, **2010**, 12, 1764-1771.
